# Supplementary material for: High-Throughput Drug Screening Identifies a Potent Wnt Inhibitor that Promotes Airway Basal Stem Cell Homeostasis
Source: PubMed Central journal article supplement — Cell Rep. Author manuscript; Available in PMC 2020 Mar 2. (PMC7050206; doi:10.1016/j.celrep.2020.01.059), 2020-02-18
Supplement: NIHMS1563642-supplement-1.pdf [file NIHMS1563642-supplement-1.pdf]

**Cell Reports, Volume 30**

## **Supplemental Information**

### **High-Throughput Drug Screening Identifies**

**a Potent Wnt Inhibitor that Promotes**

**Airway Basal Stem Cell Homeostasis**

**Cody J. Aros, Manash K. Paul, Carla J. Pantoja, Bharti Bisht, Luisa K. Meneses, Preethi Vijayaraj, Jenna M. Sandlin, Bryan France, Jonathan A. Tse, Michelle W. Chen, David W. Shia, Tammy M. Rickabaugh, Robert Damoiseaux, and Brigitte N. Gomperts**

**Figure S1. Related to Figure 1.**

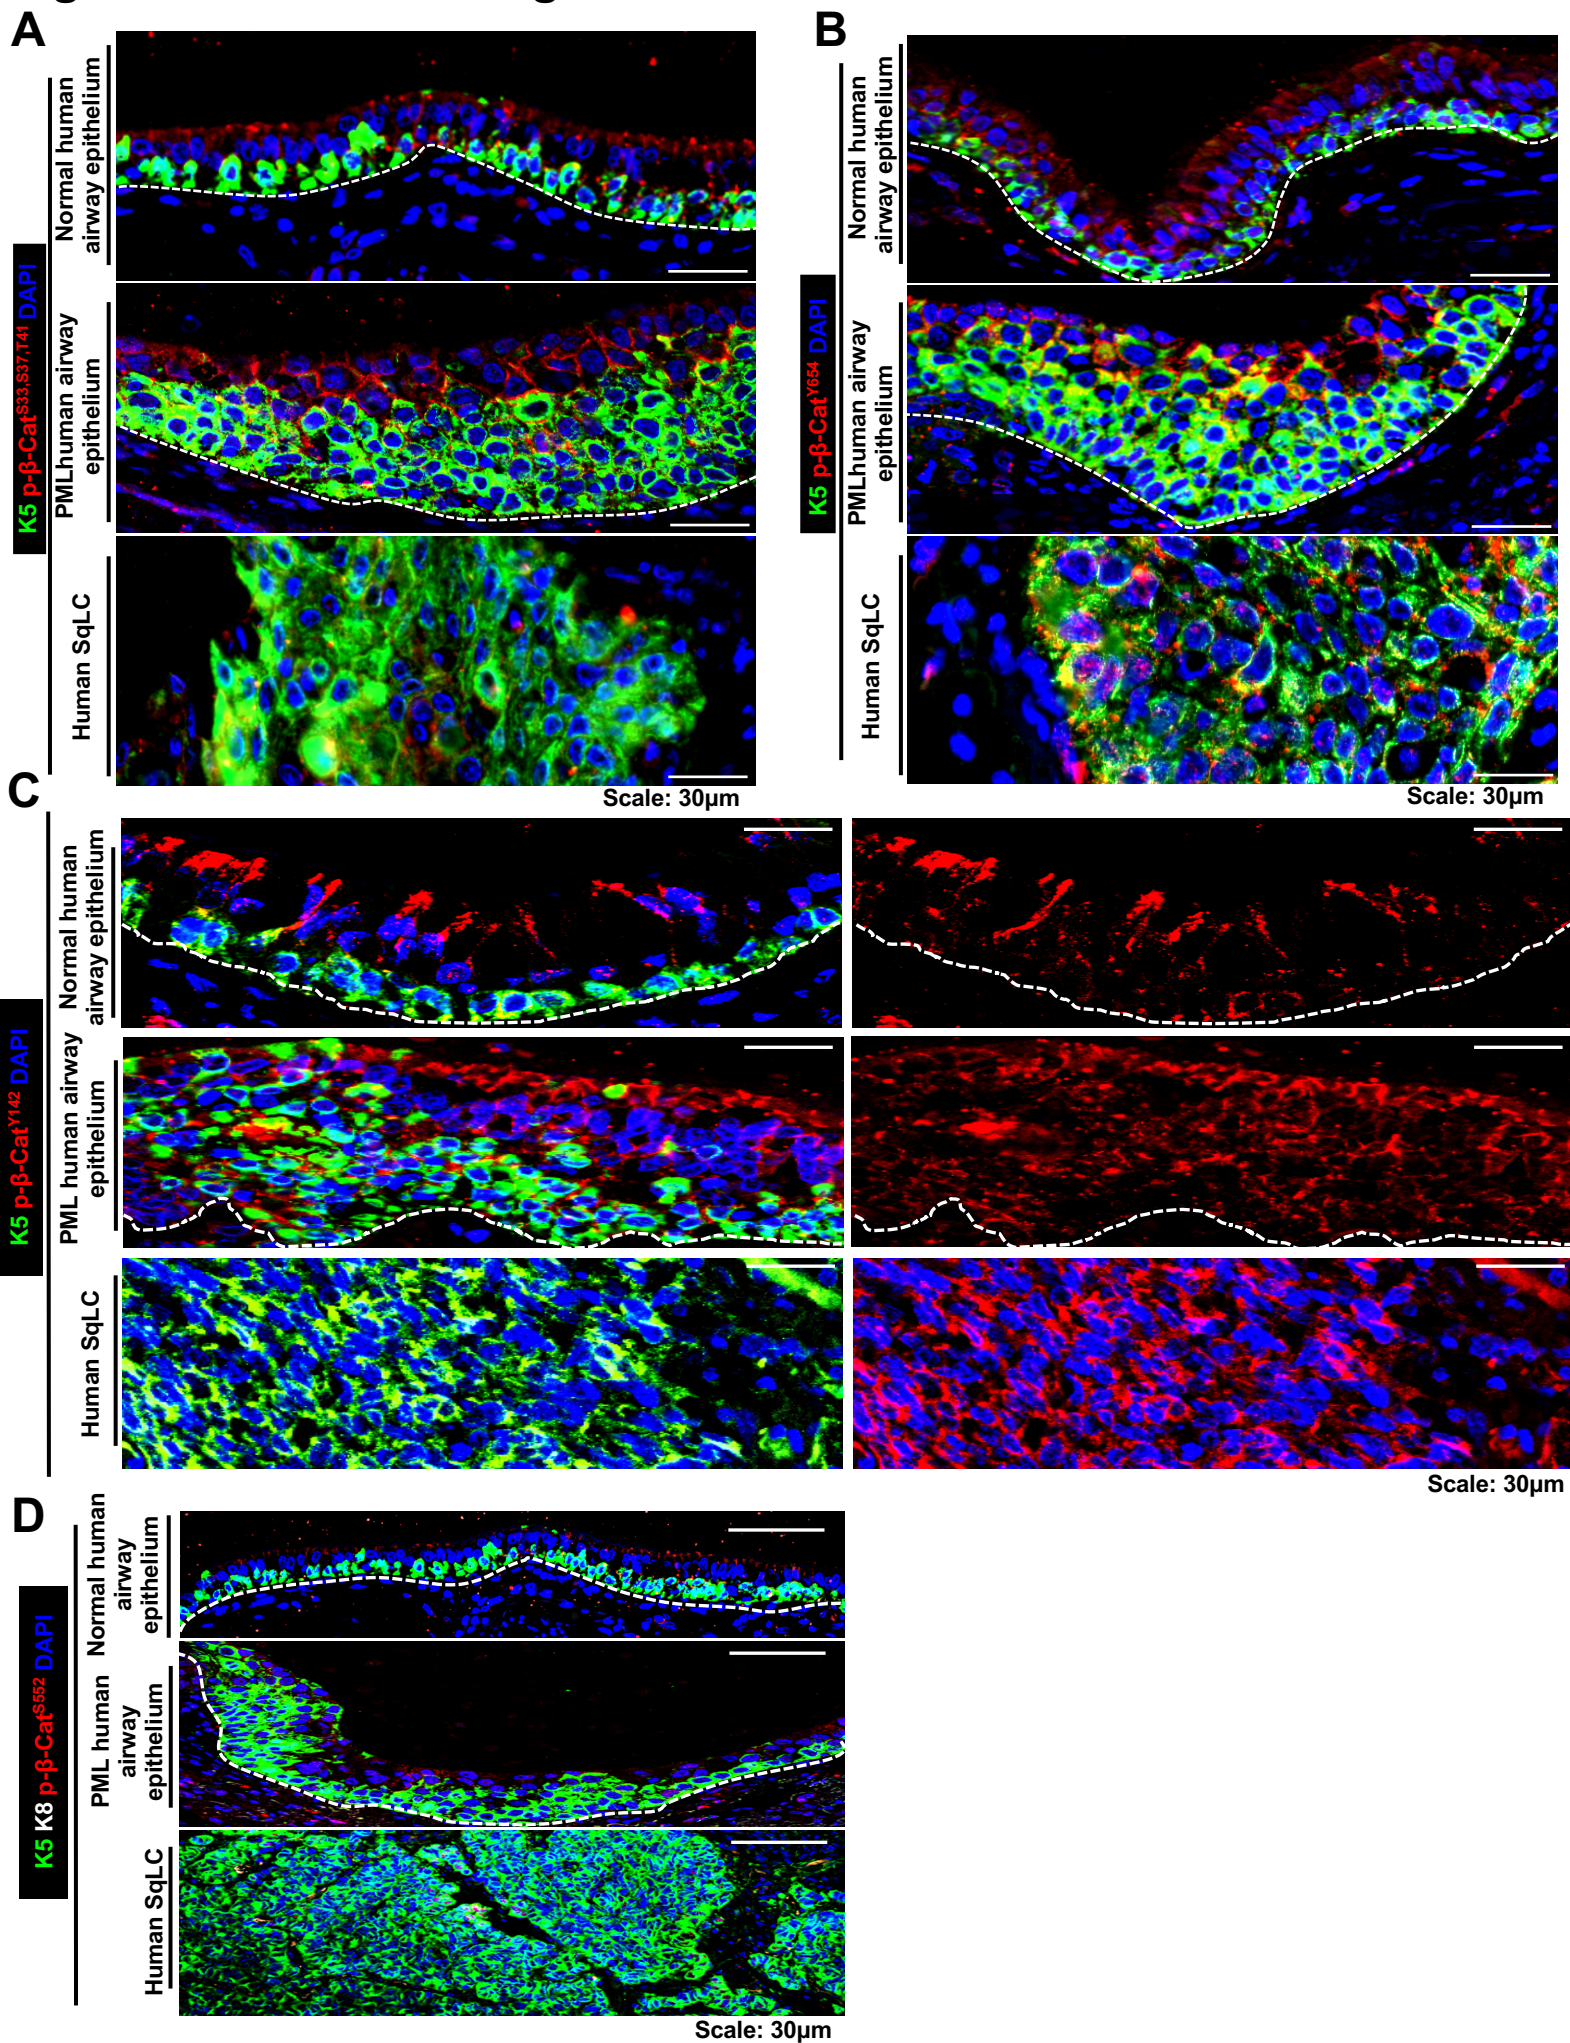

**Figure S1. Related to Figure 1.**

**A.** Representative IF images of p- $\beta$ -catenin<sup>S33,S37,T41</sup> (red) in human NL airway epithelium, PMLs, and SqLC patient samples. **B.** Representative IF images of p- $\beta$ -catenin<sup>Y654</sup> (red) in human NL airway epithelium, PMLs, and SqLC patient samples. **C.** Representative IF images of p- $\beta$ -catenin<sup>Y142</sup> (red) in human NL airway epithelium, PMLs, and SqLC patient samples. **D.** Representative IF images of p- $\beta$ -catenin<sup>S552</sup> (red) in human NL airway epithelium, PMLs, and SqLC patient samples.

**Figure S2. Related to Figure 2.**

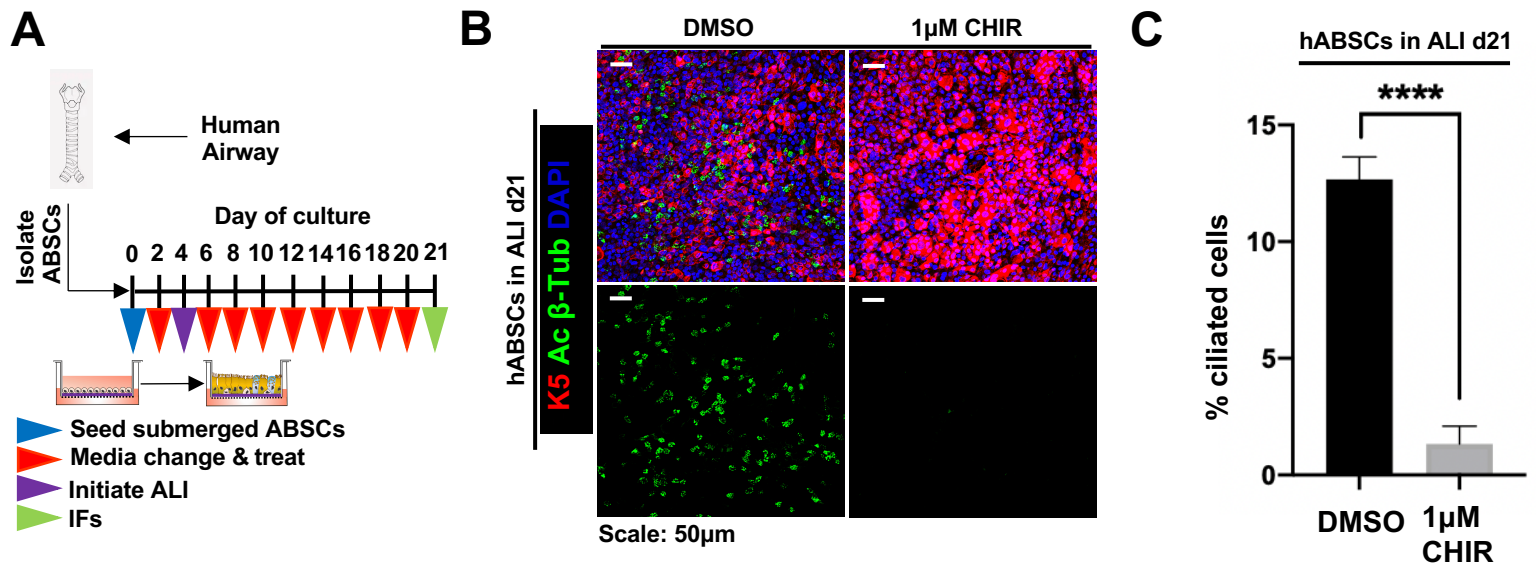

**mABSCs in submerged culture d4**

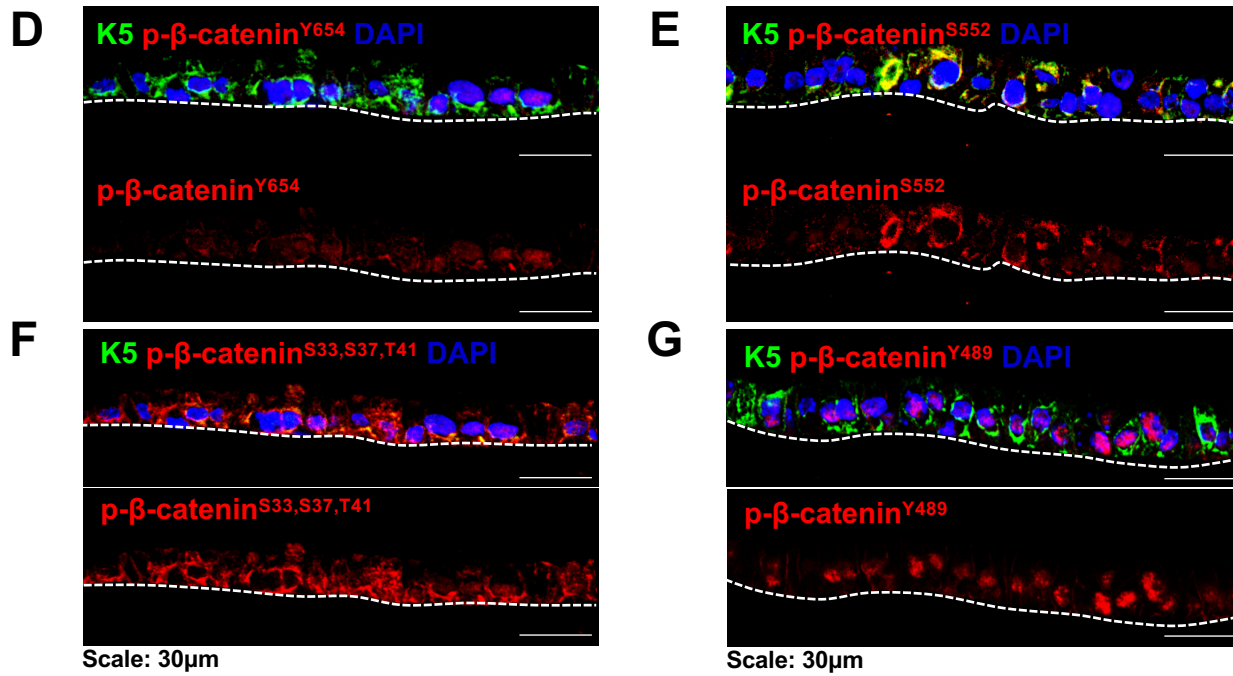

**Figure S2. Related to Figure 2.**

**A.** Experimental schematic outlining time of seeding and treatment of hABSCs under submerged and ALI culture conditions with DMSO or CHIR for 21 days. **B.** Representative IF images of hABSCs on ALI day 21 treated with DMSO or CHIR. **C.** Quantification of percentage of ciliated cells from hABSC cultures under ALI conditions for 21 days treated with DMSO or CHIR. 4 fields used for quantification. **D.** Representative IF images of mABSCs cultured under submerged conditions assessing p- $\beta$ -catenin<sup>Y654</sup> expression and localization. **E.** Representative IF images of mABSCs cultured under submerged conditions assessing p- $\beta$ -catenin<sup>S552</sup> expression and localization. **F.** Representative IF images of mABSCs cultured under submerged conditions assessing p- $\beta$ -catenin<sup>S33,S37,T41</sup> expression and localization. **G.** Representative IF images of mABSCs cultured under submerged conditions assessing p- $\beta$ -catenin<sup>Y489</sup> expression and localization. n = 3-6. \*\*\*\* p < 0.0001 by Student's t test. All error bars represent mean  $\pm$  SEM.

**Figure S3. Related to Figure 3.**

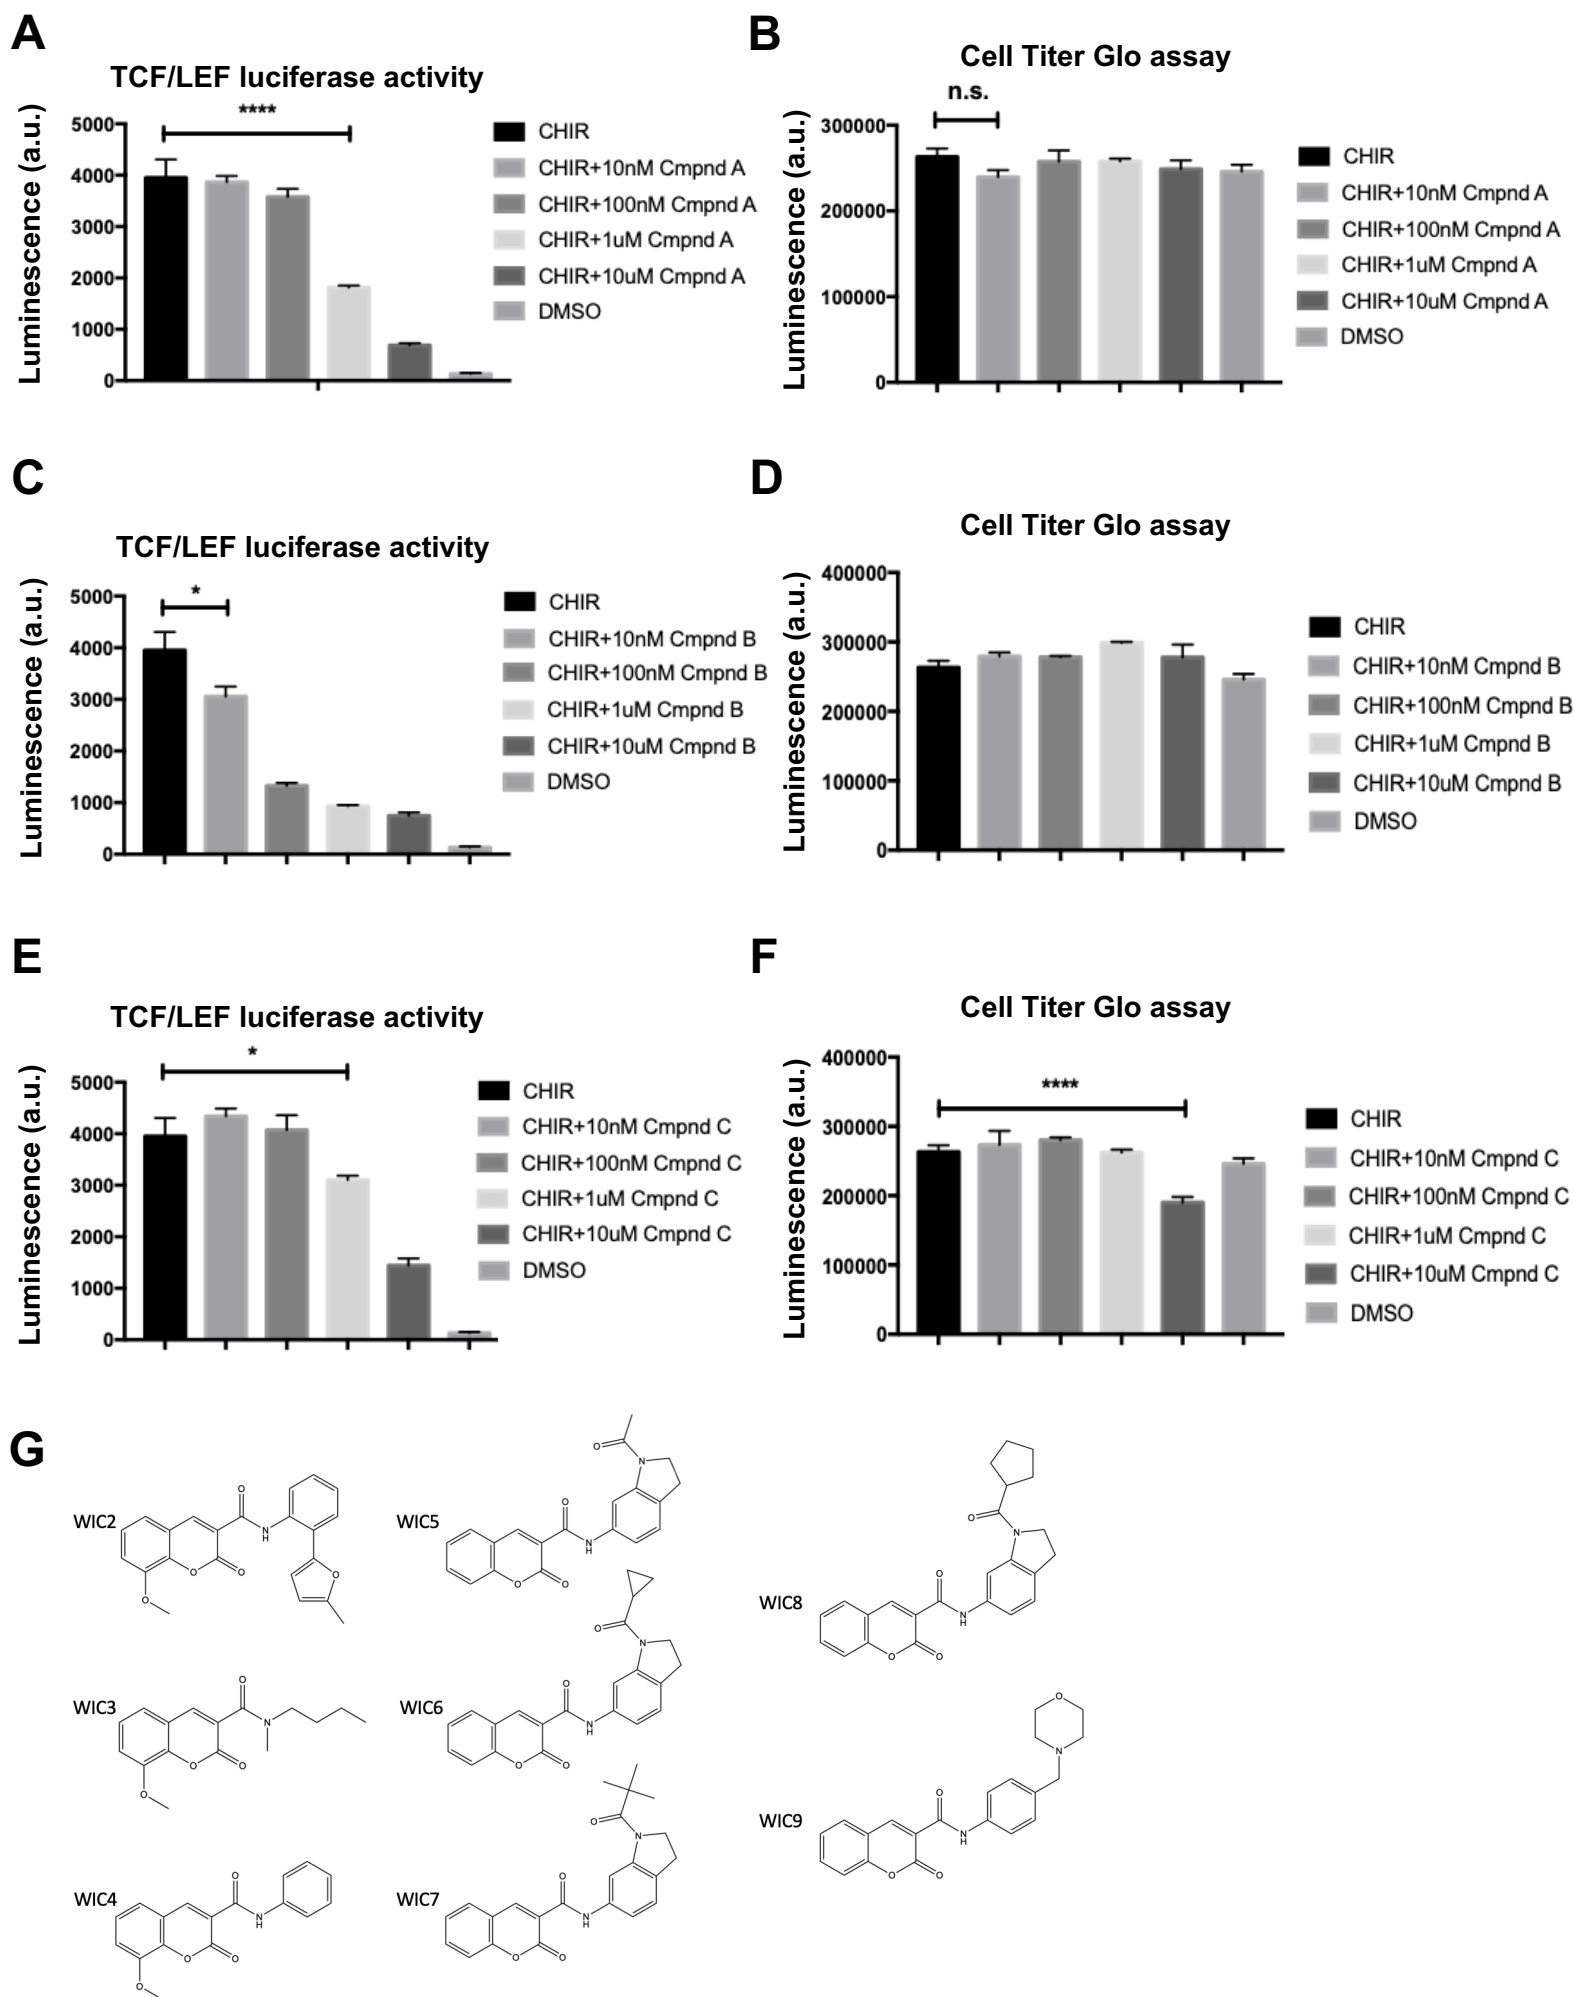

**Figure S3. Related to Figure 3.**

**A.** Bar graph representing TCF/LEF luciferase reporter activity in BEAS2B cells treated for 24 hours with DMSO, CHIR, or CHIR with varying concentrations of Compound A (Cmpnd A). **B.** Bar graph representing Cell Titer Glo assay to assess toxicity of BEAS2B cells treated for 24 hours with DMSO, CHIR, or CHIR with varying concentrations of Cmpnd A. **C.** Bar graph representing TCF/LEF luciferase reporter activity in BEAS2B cells treated for 24 hours with DMSO, CHIR, or CHIR with varying concentrations of Cmpnd B. **D.** Bar graph representing Cell Titer Glo assay to assess toxicity of BEAS2B cells treated for 24 hours with DMSO, CHIR, or CHIR with varying concentrations of Cmpnd B. **E.** Bar graph representing TCF/LEF luciferase reporter activity in BEAS2B cells treated for 24 hours with DMSO, CHIR, or CHIR with varying concentrations of Cmpnd C. **F.** Bar graph representing Cell Titer Glo assay to assess toxicity of BEAS2B cells treated for 24 hours with DMSO, CHIR, or CHIR with varying concentrations of Cmpnd C. **G.** Chemical structures of WIC2-WIC9 identified from SAR studies. n = 3-6. \* p < 0.05, \*\* p < 0.01, \*\*\* p < 0.001, \*\*\*\* p < 0.0001 by Student's t test. All error bars represent mean  $\pm$  SEM.

**Figure S4. Related to Figure 4.**

mABSCs in submerged culture d5

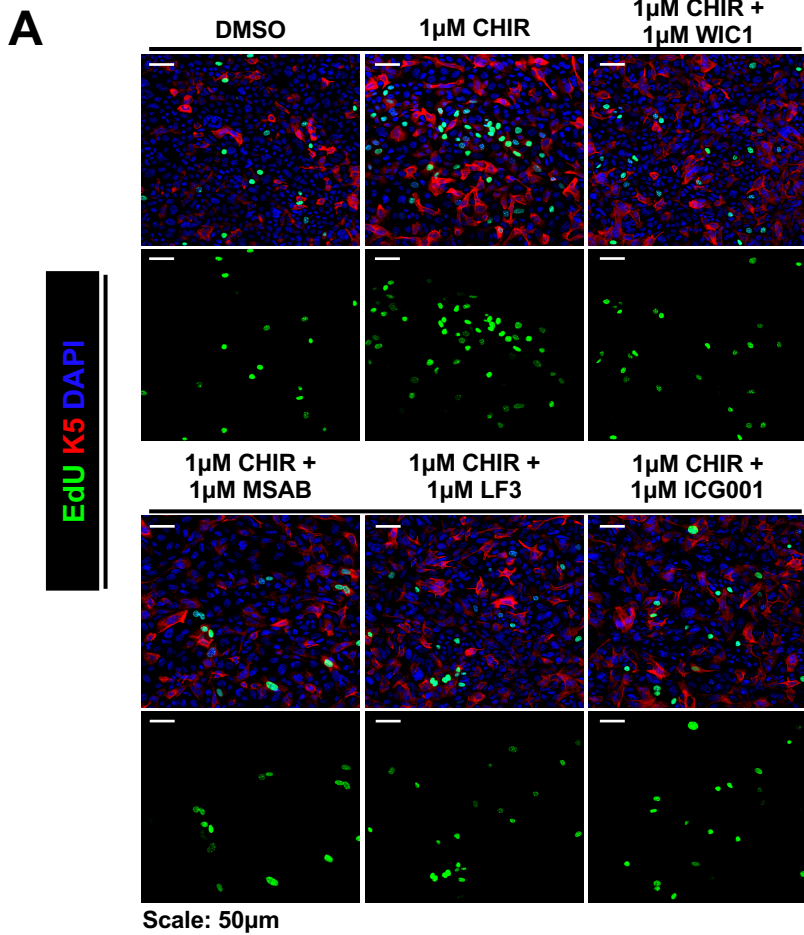

**B**

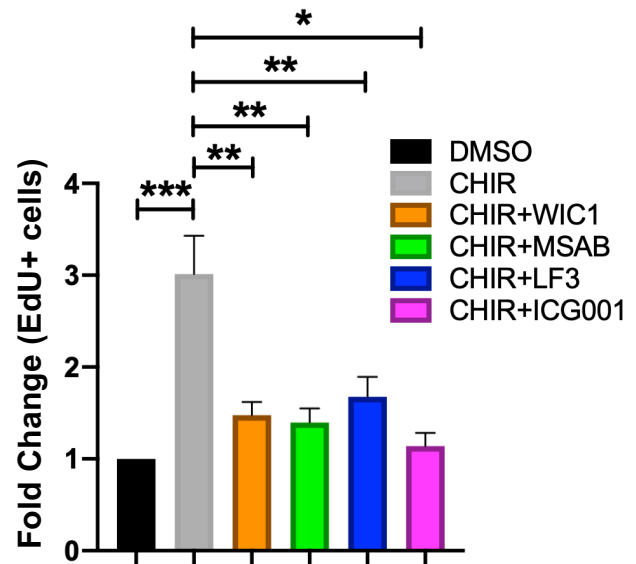

**C**

mABSCs in ALI culture d12

Ac β-Tub K5 DAPI

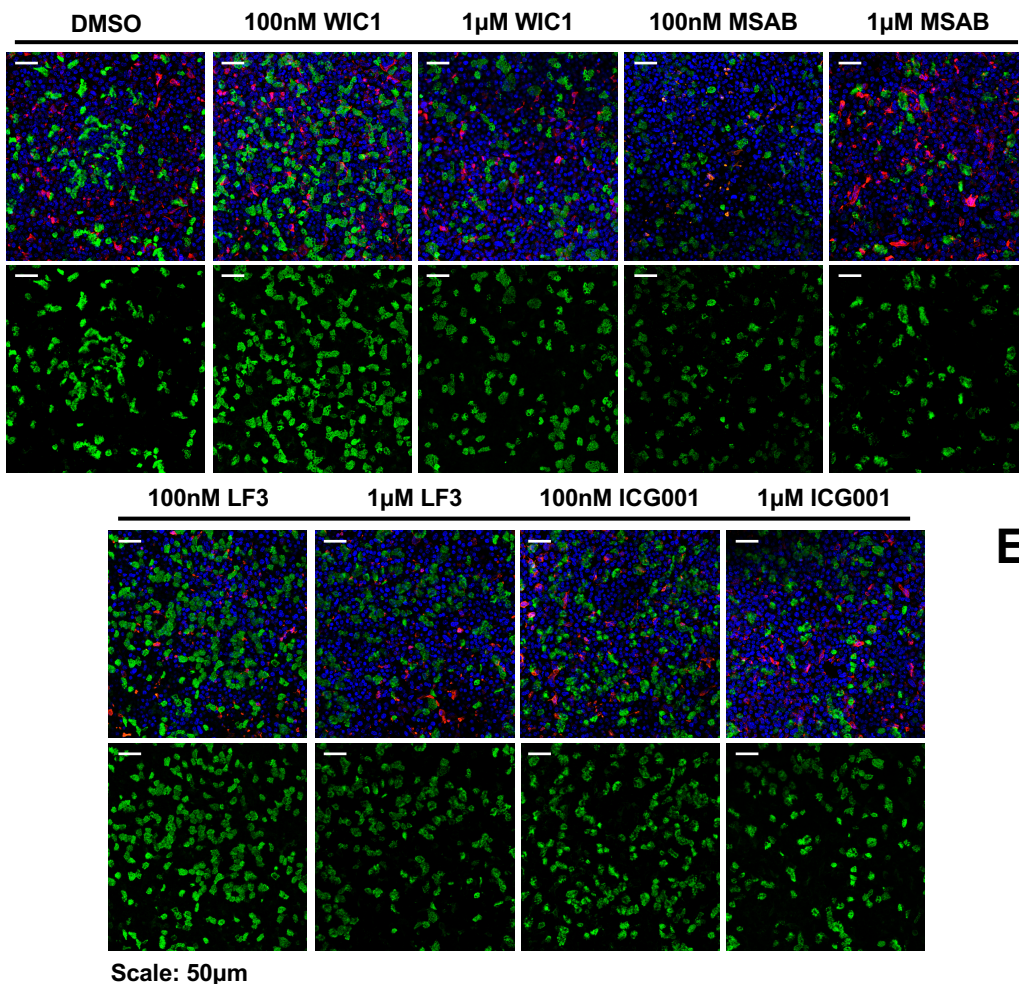

**D**

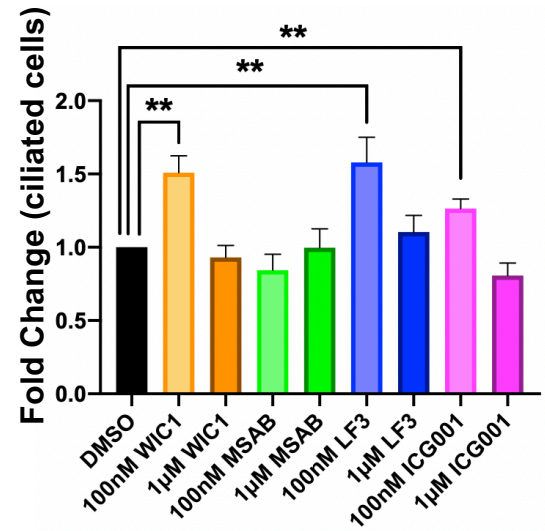

**E**

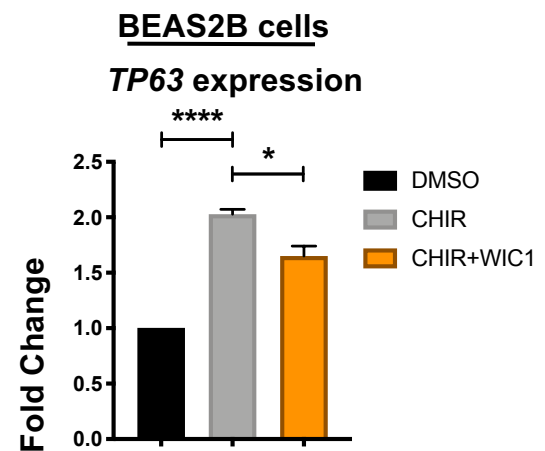



**Figure S4. Related to Figure 4.**

**A.** Representative IF images of mABSC proliferation *in vitro* under submerged conditions on day 4 treated with DMSO, 1 $\mu$ M CHIR, or 1 $\mu$ M CHIR + 1 $\mu$ M of either WIC1, MSAB, LF3, or ICG001 using click-iT EdU assay. **B.** Quantification of proliferating K5+ EdU+ mABSCs under submerged conditions on day 4 treated with DMSO, 1 $\mu$ M CHIR, or 1 $\mu$ M CHIR + 1 $\mu$ M of either WIC1, MSAB, LF3, or ICG001 using click-iT EdU assay. 5-9 fields used for quantification. **C.** Representative IF images of mABSCs *in vitro* under ALI culture conditions for 12 days treated with DMSO or indicated concentrations of WIC1, MSAB, LF3, or ICG001. **D.** Quantification of percentage of ciliated cells from mABSC cultures under ALI conditions for 12 days treated with indicated concentrations of WIC1, MSAB, LF3, or ICG001. 5 fields used for quantification. **E.** Bar graph representing qPCR data assessing mRNA expression of *TP63* in BEAS2B cells treated with DMSO, 5 $\mu$ M CHIR, or 5 $\mu$ M CHIR + 1 $\mu$ M WIC1 for 48 hours. n = 3-6. \* p < 0.05, \*\* p < 0.01, \*\*\* p < 0.001, \*\*\*\* p < 0.0001 by Student's t test. All error bars represent mean  $\pm$  SEM.
